# Supplementary material for: Nitrogen Availability Affects the Metabolic Profile in Cyanobacteria
Source: MDPI journal article supplement (doi:10.3390/metabo11120867), 2021-12-14
Supplement: s1 [file s1]

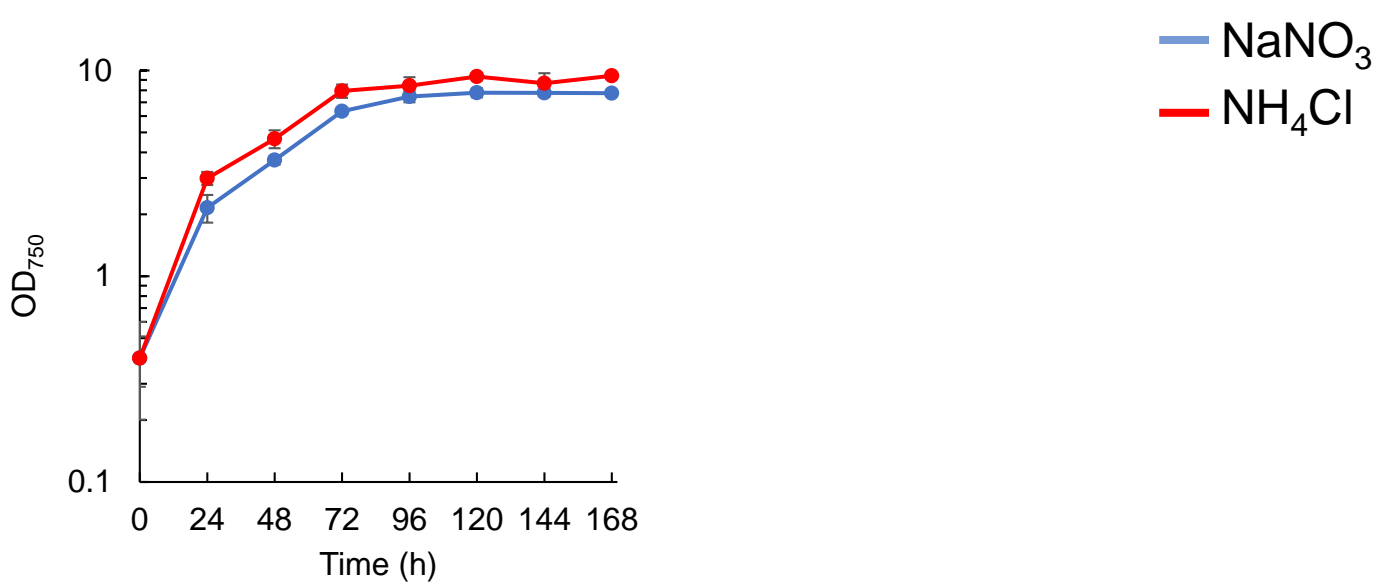

Figure S1 Growth curve of *Synechocystis* during 168 h in  $\text{NaNO}_3$  medium or  $\text{NH}_4\text{Cl}$  medium under phototrophic conditions

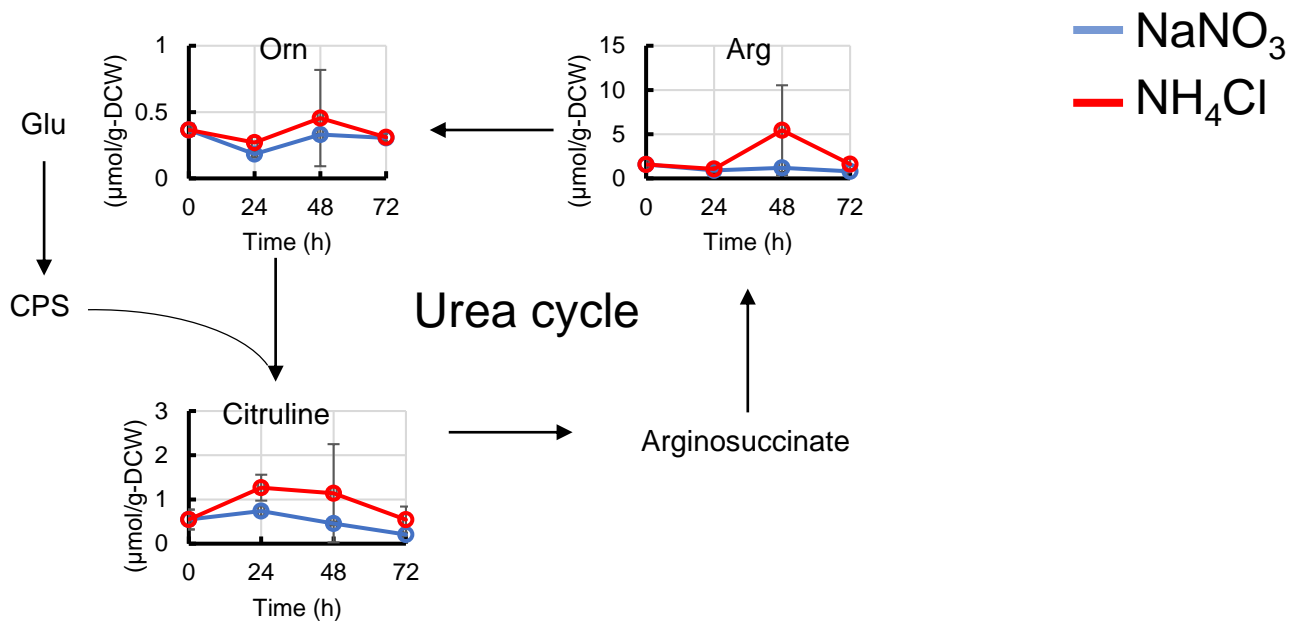

Figure S2 Comparison of metabolic profiles in the Urea cycle. The pool sizes of some metabolites of the Urea cycle were examined. Blue lines, cultivation with  $\text{NaNO}_3$ ; Red lines, cultivation with  $\text{NH}_4\text{Cl}$ ; Arg, Arginine; CPS, Carbamoyl phosphate; Glu, Glutamate; Orn, Ornithine

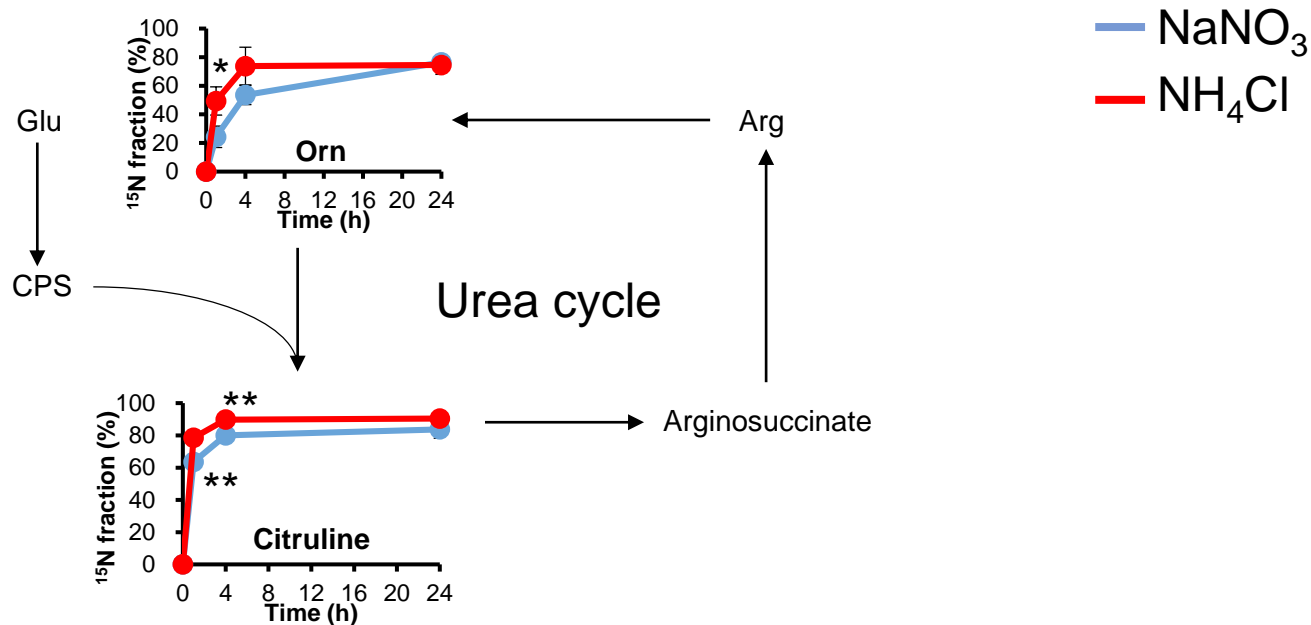

Figure S3 <sup>15</sup>N labelling rates of metabolites of the Urea cycle, <sup>15</sup>N labelling rates of the Urea cycle was compared at each time point. Blue lines, cultivation with NaNO<sub>3</sub>; Red lines, cultivation with NH<sub>4</sub>Cl.; Arg, Arginine; CPS, Carbamoyl phosphate; Glu, Glutamate; Orn, Ornithine.
